# Supplementary material for: Intracerebroventricular Administration of a 2′-O-Methyl Phosphorothioate Antisense Oligonucleotide Results in Activation of the Innate Immune System in Mouse Brain
Source: PubMed Central journal article supplement — Nucleic Acid Ther. 2018 Apr 1;28(2):63–73. doi: 10.1089/nat.2017.0705 (PMC5899290; doi:10.1089/nat.2017.0705), 2018-04-01
Supplement: Supp_Data.pdf [file Supp_Data.pdf]

## Supplementary Data

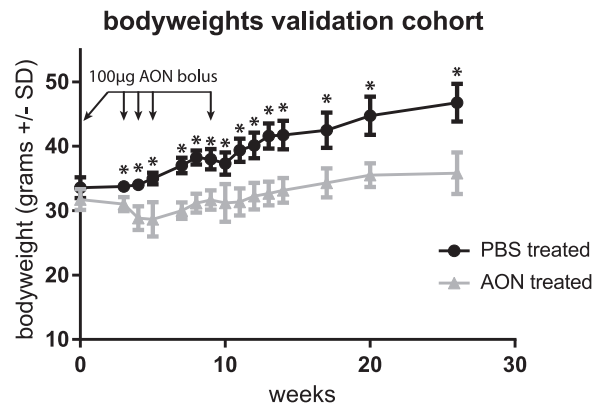

**SUPPLEMENTARY FIG. S1.** Body weights of mice in validation cohort. C57BL/6 mice were injected intracerebroventricularly with a total of 500 µg AON during 10 weeks. Significantly reduced body weight was observed after each 100 µg AON injection. Mice were sacrificed ~4 months after the last AON injection for molecular analysis. Based on four PBS injected versus eight AON injected mice. AON, antisense oligonucleotide; PBS, phosphate buffered saline.

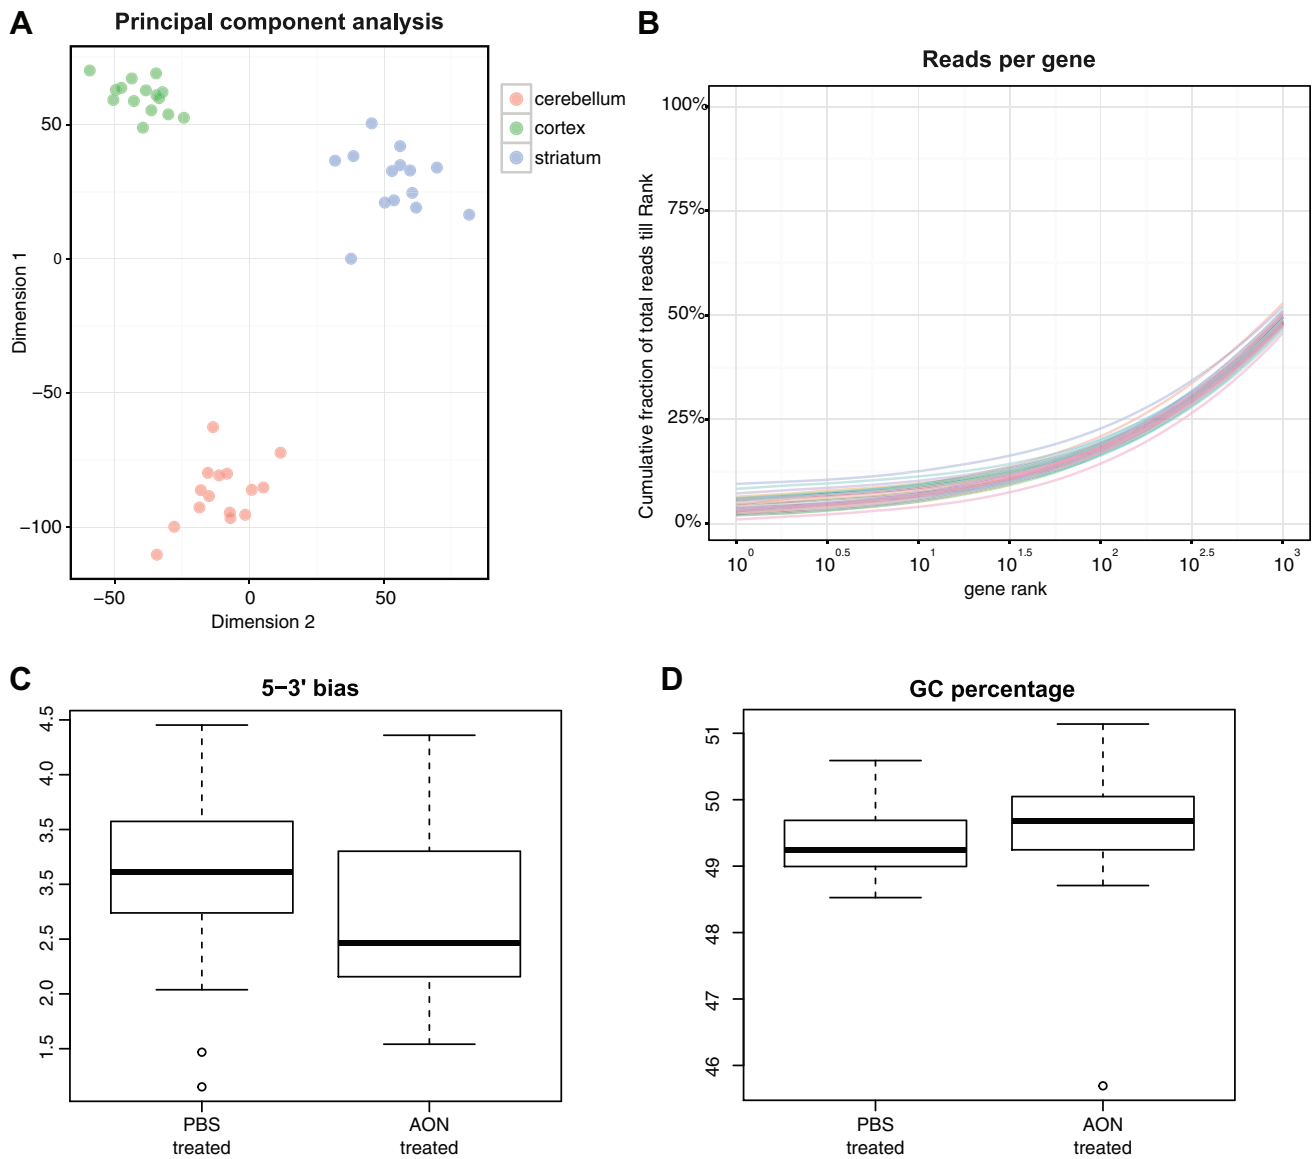

**SUPPLEMENTARY FIG. S2.** RNA sequencing quality control. **(A)** Principal component analysis was performed on normalized gene counts to determine clustering per brain region. Depicted is plot of samples used for differential gene analysis. **(B)** Percentage of total reads per gene shows similar distribution for all 44 RNA sequencing samples. The first 1,000 genes sorted on highest read counts are depicted, accounting for ~50% of total reads per sample. **(C)** Average 5' to 3' read bias per treatment group. **(D)** Average GC percentage of reads per treatment group.

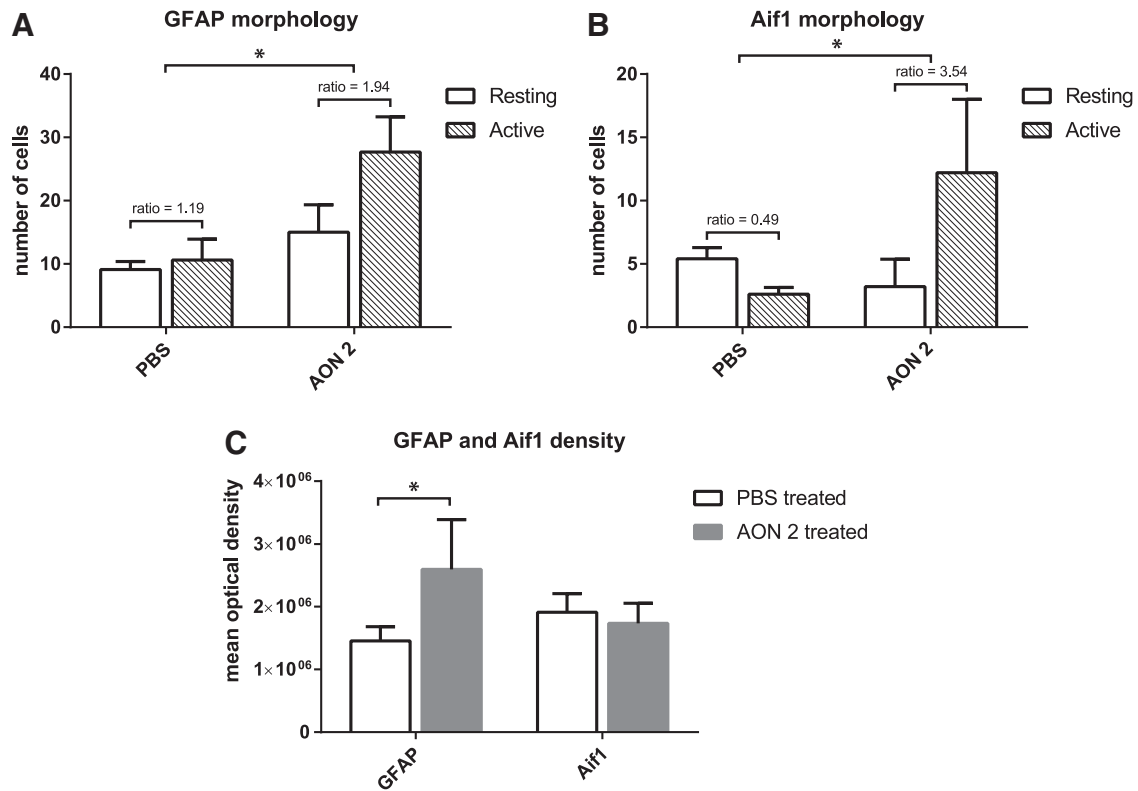

**SUPPLEMENTARY FIG. S3.** Assessment of astrocyte and microglia markers in striatum of AON treated mice. Immunohistological staining was performed for an extra group of mice treated ICV with 665  $\mu$ g of a different AON (AON 2) from a previous study [1]. AON 2 is also a fully PS backbone, 2'-methyl modified 19-mer (sequence: GUCCCAU-CAUUCAGGUCCAU), designed for splicing modulation of huntingtin, but was shown not to affect murine huntingtin [1]. The PBS treated group is identical as in Fig. 4. **(A)** Based on GFAP based morphology scoring, a significantly increased ratio of activated astrocytes was present in striatum of AON 2 treated mice compared to PBS treated mice. **(B)** Significantly increased levels of activated microglia were detected in striatum after treatment with AON 2. **(C)** Optical density quantification showed increased levels of GFAP in striatum after AON 2 treatment. Based on three sections per mouse and five mice per treatment group. \* $P < 0.05$  with Student's  $t$ -test. GFAP, glial fibrillary acidic protein; ICV, intracerebroventricularly; PS, phosphorothioate.

SUPPLEMENTARY TABLE S1. PRIMERS USED FOR ddPCR

| <i>Target gene (mouse)</i> | <i>Primer name</i> | <i>Sequence (5' to 3')</i> |
|----------------------------|--------------------|----------------------------|
| <i>Nrp2</i>                | mNrp2_ex9_fw       | AGCCTAAATGGCAAGGACTG       |
| <i>Nrp2</i>                | mNrp2_ex10_rev     | ATCGAACCTTCGGATGTCAG       |
| <i>Slfn5</i>               | mSlfn5_Qex4_Fw     | ATGTGTGGAAGACCTGCAGAAG     |
| <i>Slfn5</i>               | mSlfn5_Qex5_Rev    | AATCTGCGAAGAGGTCCTTG       |
| <i>Trim25</i>              | mTrim25_Qex4_Fw    | ATGGCTCAGGTAACAAGGGAG      |
| <i>Trim25</i>              | mTrim25_Qex6_Rev   | GGGAGCAACAGGGGTTTTCTT      |
| <i>Bst2</i>                | mBst2_Qex1_Fw      | CACAGGCAAACCTCCTGCAAC      |
| <i>Bst2</i>                | mBst2_Qex3_Rev     | TGGTTCAGCTTCGTGACTTC       |
| <i>Ifit3</i>               | mIfit3_Qex1_Fw     | TTTCCCAGCAGCACAGAAAC       |
| <i>Ifit3</i>               | mIfit3_Qex2_Rev    | ACTTCAGCTGTGGAAGGATCG      |
| <i>Oasl2</i>               | mOASL2_Qex3_Fw     | TGAAGAACCTCCTCCGGTTG       |
| <i>Oasl2</i>               | mOASL2_Qex4_Rev    | TTTTGAGGGCAACACTGCAC       |
| <i>Lgals3bp</i>            | mLgals3bp_Qex1_Fw  | TGCTGGTTCAGGGACTCAA        |
| <i>Lgals3bp</i>            | mLgals3bp_Qex2_Rev | CCACCGGCCTCTGTAGAAGA       |
| <i>Hprt</i>                | mHprt_Qex6_fw      | TCCCTGGTTAAGCAGTACAGCC     |
| <i>Hprt</i>                | mHprt_Qex7_rev     | CGAGAGGTCCTTTTACCAGC       |
| <i>Actb</i>                | mActb_Qex2_Fw      | GGCTGTATTCCCCTCCATCG       |
| <i>Actb</i>                | mActb_Qex3_Rev     | CCAGTTGGTAACAATGCCATGT     |
| <i>Rpl22</i>               | mRpl22ex3_fw1      | AGGAGTCGTGACCATCGAAC       |
| <i>Rpl22</i>               | mRpl22ex3_rev1     | TTTGGAGAAAGGCACCTCTG       |

SUPPLEMENTARY TABLE S2. VALIDATION  
OF EXPRESSION CHANGES IN STRIATUM

| <i>Gene</i>   | <i>Log2FC<br/>RNA<br/>sequencing</i> | <i>Log2FC<br/>ddPCR test<br/>cohort</i> | <i>Log2FC<br/>ddPCR validation<br/>cohort</i> |
|---------------|--------------------------------------|-----------------------------------------|-----------------------------------------------|
| <i>Slnf5</i>  | 0.8                                  | 1.4                                     | NT                                            |
| <i>Oasl</i>   | 2.5                                  | 2.7                                     | 2.8                                           |
| <i>Ifit3</i>  | 1.8                                  | 1.7                                     | 2.4                                           |
| <i>bst2</i>   | 2.7                                  | 2.1                                     | 2.7                                           |
| <i>Trim25</i> | 0.8                                  | 1.0                                     | 1.2                                           |
| <i>Lgals3</i> | 1.3                                  | 0.9                                     | 1.4                                           |
| <i>Nrp2</i>   | -1.0                                 | NT                                      | -0.7                                          |

The Log2FC for the top differentially expressed genes in striatum of AON treated mice was validated using ddPCR using RNA from the test- and validation cohort. To allow for high throughput, cDNA from mice in the same treatment group was pooled. Test cohort: four PBS versus six AON treated mice. Validation cohort: four PBS versus eight AON treated mice.

AON, antisense oligonucleotide; ddPCR, droplet digital PCR; NT, not tested; PBS, phosphate buffered saline.

### Supplementary Reference

1. Casaca-Carreira J, LJ Toonen, MM Evers, A Jahanshahi, WM van-Roon-Mom and Y Temel. (2016). In vivo proof-of-concept of removal of the huntingtin caspase cleavage motif-encoding exon 12 approach in the YAC128 mouse model of Huntington's disease. *Biomed Pharmacother* 84:93–96.
